# Supplementary material
Source: ML conference proceedings conference paper supplement (https://openaccess.thecvf.com/content/CVPR2024/html/Shen_Adaptive_Softassign_via_CVPR_2024_paper.html)
Supplement: Supplementary file 1 [file Shen_Adaptive_Softassign_via_CVPR_2024_supplemental.pdf]

# Adaptive Softassign via Hadamard-Equipped Sinkhorn

## Supplementary Material

### A. More details of the projected fixed point method

Consider the objective function

$$\mathcal{Z}(M) = \frac{1}{2} \text{tr} \left( M^T A M \tilde{A} \right) + \lambda \text{tr} \left( M^T K \right). \quad (31)$$

Given an initial condition  $M^{(k)}$ , we can linearize the objective function at  $M^{(k)}$  via the Taylor series approximation:

$$\mathcal{Z}(M) \approx \mathcal{Z}(M^{(k)}) + \text{tr} \left\{ \nabla \mathcal{Z}(M^{(k)})^T (M - M^{(k)}) \right\} \quad (32)$$

One can find an approximate solution to (31) by maximizing a sequence of the linearization of  $\mathcal{Z}(M)$  in (32). Since  $M^{(k)}$  is a constant, the maximization of the linear approximation is equivalent to the following linear assignment problem

$$\max_{M \in \Sigma_{n \times n}} \text{tr}(\nabla \mathcal{Z}(M^{(k)})^T M) = \max_{M \in \Sigma_{n \times n}} \langle \nabla \mathcal{Z}(M^{(k)}), M \rangle, \quad (33)$$

Therefore, the quadratic assignment problem can be transformed into a series of linear assignment problems. This idea is first proposed in [8] with a different objective function. The solution to each linear assignment problem in (33) can be shown as

$$M^{(k)} = \mathcal{P}(\nabla \mathcal{Z}(M^{(k-1)})). \quad (34)$$

where  $\mathcal{P}$  is a projection that includes the doubly stochastic projection used in [23] and the discrete projection used in [19]. A generation of such an iterative formula is

$$M^{(k)} = (1 - \alpha)M^{(k-1)} + \alpha \mathcal{P}(\nabla \mathcal{Z}(M^{(k-1)})). \quad (35)$$

Such a formula can cover all the points between two doubly stochastic matrices. The resulting algorithm is called the *projected fixed-point method* [19].

### B. Proofs of Proposition 1 and Proposition 2

**Proposition 1** For a square matrix  $X$  and  $\beta > 0$ , we have

$$|\langle S_X^\beta, X \rangle - \langle S_X^\infty, X \rangle| \leq \|S_X^\beta - S_X^\infty\| \|X\| \leq \frac{c}{\mu} (e^{-\mu\beta}) \|X\|, \quad (36)$$

where  $c$  and  $\mu > 0$  are constants independent of  $\beta$ .

**Proposition 2** For a square matrix  $X$  and  $\beta, \Delta\beta > 0$ , we have

$$\|S_X^\beta - S_X^{\beta+\Delta\beta}\| \leq (1 - e^{-\mu\Delta\beta}) \frac{c}{\mu} e^{-\mu\beta}, \quad (37)$$

where  $c$  and  $\mu > 0$  are constants independent of  $\beta$ .

**Proof** We first transform the problem (12) into vector form

$$\langle M, X \rangle + \frac{1}{\beta} \mathcal{H}(M) = \mathbf{m}^T \mathbf{x} - \frac{1}{\beta} \sum \mathbf{m}_i \ln(\mathbf{m}_i), \quad (38)$$

where  $\mathbf{m} = \text{vec } M$ . Since  $\sum_i \mathbf{m}_i = n$ , then (12) is equivalent to the well studied problem [4]

$$\mathbf{s}_x^\beta = \underset{\mathbf{m}}{\text{argmin}} \mathbf{m}^T (-\mathbf{x}) + \frac{1}{\beta} \sum \mathbf{m}_i (\ln(\mathbf{m}_i) - 1). \quad (39)$$

Let  $\dot{S}_X^\beta$  be derivative of  $S_X^\beta$  with respect to  $\beta$ , according to the proof of [4, Proposition 5.1],  $\dot{S}_X^\beta$  converges towards zero exponentially i.e., there exist a  $c_0 > 0$  and  $\mu > 0$  such that

$$|(\dot{S}_X^\beta)_{ij}| \leq c_0 e^{-\mu\beta}.$$

According to the fundamental theory of Calculus,

$$\begin{aligned} |(S_X^\infty)_{ij} - (S_X^\beta)_{ij}| &= \left| \int_\beta^\infty (\dot{S}_X^\tau)_{ij} d\tau \right| \leq \int_\beta^\infty |(\dot{S}_X^\tau)_{ij}| d\tau \\ &\leq \frac{c_0}{\mu} (e^{-\mu\beta}). \end{aligned} \quad (40)$$

Similarly, we have

$$\begin{aligned} |(S_X^\beta)_{ij} - (S_X^{\beta+\Delta\beta})_{ij}| &= \left| \int_\beta^{\beta+\Delta\beta} (\dot{S}_X^\tau)_{ij} d\tau \right| \\ &\leq \frac{c_0}{\mu} (e^{-\mu\beta} - e^{-\mu(\beta+\Delta\beta)}). \end{aligned} \quad (41)$$

The rest of the proof for the two propositions follows easily from this.

### C. Proof of Proposition 3

**Proposition 3** Hadamard-Equipped Sinkhorn

Let  $X \in \mathbb{R}_+^{n \times n}$ , then

$$\mathcal{P}_{sk}(X) = X \circ SK^{(X)} = X \circ (\mathbf{r}^T \otimes \mathbf{c}) \quad (42)$$

where  $SK^{(X)} \in \mathbb{R}^{n \times n}$  is unique,  $\mathbf{r}$  and  $\mathbf{c} \in \mathbb{R}_+^n$  are balancing vectors so that  $D_{(\mathbf{r})} X D_{(\mathbf{c})}$  is a doubly stochastic matrix.

**Proof**

$$\begin{aligned} \mathcal{P}_{sk}(X) &= D_{(\mathbf{r})} X D_{(\mathbf{c})} \\ &= X \circ \underbrace{(\mathbf{r}^T \otimes \mathbf{c})}_{SK^{(X)}}. \end{aligned} \quad (43)$$

## D. Proofs of Lemma 1, Lemma 2, and Lemma 3

**Lemma 1** Let  $X \in \mathbb{R}_+^{n \times n}$ ,  $\mathbf{u}$  and  $\mathbf{v} \in \mathbb{R}_+^n$ , then

$$\mathcal{P}_{sk}(X) = \mathcal{P}_{sk}(X \circ (\mathbf{u}^T \otimes \mathbf{v})). \quad (44)$$

**Proof** Let  $Y = X \circ (\mathbf{u}^T \otimes \mathbf{v})$ , we have

$$\mathcal{P}_{sk}(Y) = Y \circ (\mathbf{r}_Y^T \otimes \mathbf{c}_Y). \quad (45)$$

Then

$$\begin{aligned} \mathcal{P}_{sk}(X \circ (\mathbf{u}^T \otimes \mathbf{v})) &= X \circ (\mathbf{u}^T \otimes \mathbf{v}) \circ (\mathbf{r}_Y^T \otimes \mathbf{c}_Y) \\ &= X \circ (\underbrace{(\mathbf{u} \circ \mathbf{r}_Y)}_{\mathbf{r}_1} \otimes \underbrace{(\mathbf{v} \circ \mathbf{c}_Y)}_{\mathbf{c}_1}) \\ &= X \circ (\mathbf{r}_1^T \otimes \mathbf{c}_1) \\ &= \mathcal{P}_{sk}(X). \end{aligned} \quad (46)$$

Since  $X \circ (\mathbf{r}_1^T \otimes \mathbf{c}_1)$  is a doubly stochastic matrix,  $\mathbf{r}_1^T \otimes \mathbf{c}_1 = SK^{(X)}$  according to the Proposition 3.

**Lemma 2** Sinkhorn-Hadamard product

Let  $X_1, X_2 \in \mathbb{R}_+^{n \times n}$ , then  $\mathcal{P}_{sk}(X_1 \circ X_2) = \mathcal{P}_{sk}(\mathcal{P}_{sk}(X_1) \circ X_2)$ .

**Proof** According to Lemma 1, the right-hand side is

$$\begin{aligned} \mathcal{P}_{sk}(\overbrace{\mathcal{P}_{sk}(X_1) \circ X_2}^{\text{right-hand side}}) &= \mathcal{P}_{sk}(\overbrace{X_1 \circ SK^{(X_1)} \circ X_2}^{\text{right-hand side}}) \\ &= \mathcal{P}_{sk}(X_1 \circ X_2), \end{aligned} \quad (47) \quad (48)$$

which proves this Lemma.

**Lemma 3** Sinkhorn-Hadamard power

Let  $X_1, X_2 \in \mathbb{R}_+^{n \times n}$ , then  $\mathcal{P}_{sk}(X^{\circ(ab)}) = \mathcal{P}_{sk}(\mathcal{P}_{sk}(X^{\circ a})^{\circ b})$ , where  $a$  and  $b$  are two constants not equal to zero.

**Proof** According to Lemma 1, the right-hand side is

$$\mathcal{P}_{sk}(\mathcal{P}_{sk}(X^{\circ a})^{\circ b}) = \mathcal{P}_{sk}((X^{\circ a} \circ SK^{(X^{\circ a})})^{\circ b}) \quad (49)$$

$$= \mathcal{P}_{sk}(X^{\circ(ab)} \circ (SK^{(X^{\circ a})})^{\circ b}) \quad (50)$$

$$= \mathcal{P}_{sk}(X^{\circ(ab)}) \quad (51)$$

which completes the proof.

## E. Relation with the proximal point method

In this subsection, we shall demonstrate the equivalence and difference between the adaptive softassign and the proximal point method proposed by [40]. The linear convergence rate of the adaptive softassign methods can be inferred from the convergence of the proximal point method. While the difference brings computational efficiency.

**Proposition 4** The softassign transition (25) can solve

$$S_X^{\beta_2} = \arg \max_{s \in \Sigma_{n \times n}} \langle X, S \rangle - (\beta_2 - \beta_1) D_h(S, S_X^{\beta_1}), \quad (52)$$

$$D_h(\mathbf{x}, \mathbf{y}) = \sum_{i=1}^n x_i \log \frac{x_i}{y_i} - \sum_{i=1}^n x_i + \sum_{i=1}^n y_i. \quad (53)$$

**Proof** The solution of (52) in the proximal point method is

$$\mathcal{P}_{sk}(S_X^{\beta_1} \circ \exp((\beta_2 - \beta_1)X)). \quad (54)$$

According to the Hadamard-Equipped Sinkhorn Theorem, we have

$$S_X^{\beta_1} = \exp(\beta_1 X) \circ SK^{(\exp(\beta_1 X))}. \quad (55)$$

Then

$$\begin{aligned} &\mathcal{P}_{sk}(S_X^{\beta_1} \circ \exp((\beta_2 - \beta_1)X)) \\ &= \mathcal{P}_{sk}(\exp(\beta_1 X) \circ \exp((\beta_2 - \beta_1)X)) \\ &= \mathcal{P}_{sk}(\exp(\beta_2 X)) \\ &= S_X^{\beta_2}, \end{aligned} \quad (56)$$

which is equivalent to the softassign transition (25).

According to Proposition 4, we can rewrite the iterative formula of the adaptive softassign as a proximal point method in [40]

$$S_X^{(k)} = \arg \max_{s \in \Sigma_{n \times n}} \langle X, S \rangle - (\Delta\beta) D_h(S, S_X^{(k-1)}), \quad (57)$$

where  $D_h(\cdot)$ , the Bregman divergence, is a regularization term to define the proximal operator. This indicates adaptive softassign is a variant of the proximal point method for problem (12) and enjoys a linear convergence rate [40].

Let us discuss the difference between adaptive softassign and the proximal point method. Adaptive softassign aims at obtaining a sub-optimal solution and  $\beta_\epsilon$  with a given error bound, where  $\beta_\epsilon$  can be used as a good initial  $\beta_0$  in the next adaptive softassign in the whole graph matching process. While the proximal point method aims to find the exact solution, its efficiency is secondary and the change of  $\beta$  is implicit. As to the computation aspect, the proximal point method solves (52) according to

$$S_X^{\beta_2} = \mathcal{P}_{sk}(S_X^{\beta_1} \circ \exp((\beta_2 - \beta_1)X)). \quad (58)$$

Softassign transition only adapts a power operation and does not need the  $X$ , which indicates the change of  $\beta$  more clearly. One can track and analyze the explicit change of  $\beta$  easily.

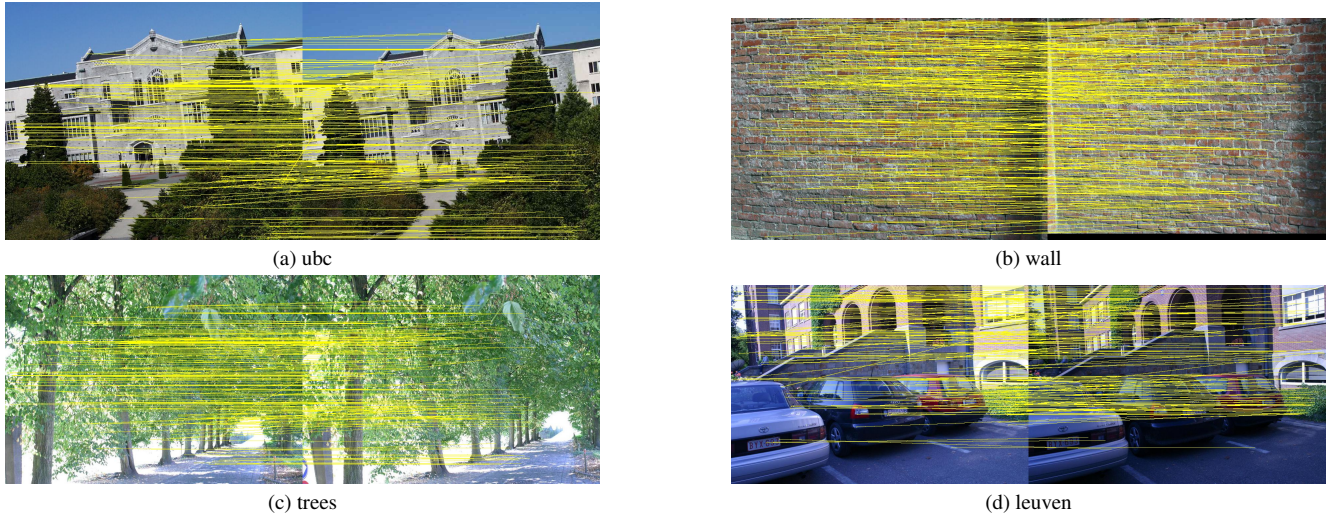

Figure 7. Graphs from real images matching. The yellow lines represent the correspondence between key points of the pictures.

## F. Baselines and visualization of experiments

Visualization of the matching results is shown in Figure 7.

### Baselines:

- DSPFP [23] is a fast doubly stochastic projected fixed-point method with an alternating projection.
- GA [8] can be considered a softassign-based projected fixed-point method with an outer annealing process.
- AIPFP [19, 23] is an integer projected fixed point method with a fast greedy integer projection.
- SCG [32] is a constrained gradient method with a dynamic softassign invariant to the nodes' number.
- GWL [42] measures the distance between two graphs by Gromov-Wasserstein discrepancy and matches graphs by optimal transport.
- S-GWL [41] is a scalable variant of GWL. It divides matching graphs into small graphs to match.
- MAGNA++ [36] is a global network alignment method for protein-protein interaction network matching, which focuses on node and edge conservation.
- GRASP [11] aligns nodes based on functions derived from Laplacian matrix eigenvectors.
